# Supplementary material for: Comparative oncogenomics identifies tyrosine kinase FES as a tumor suppressor in melanoma
Source: JCI journal article supplement (doi:10.1172/jci91291), 2017-05-01
Supplement: sd1 [file 1]

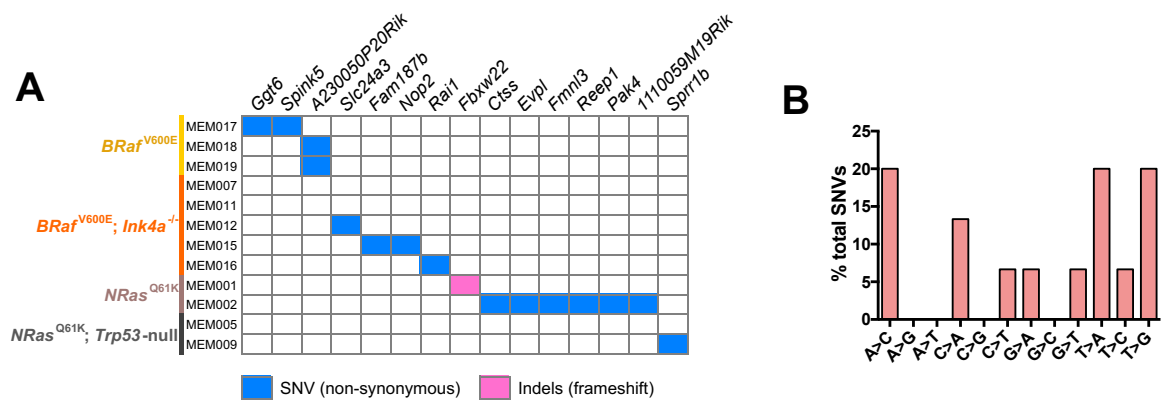

**Supplementary Figure 1: Whole-exome sequencing of murine melanoma genomes. (A)** Validated SNAs and indels and **(B)** mutational signature from 12 mouse melanomas of genetically-defined origins.

## Supplementary Figure 2

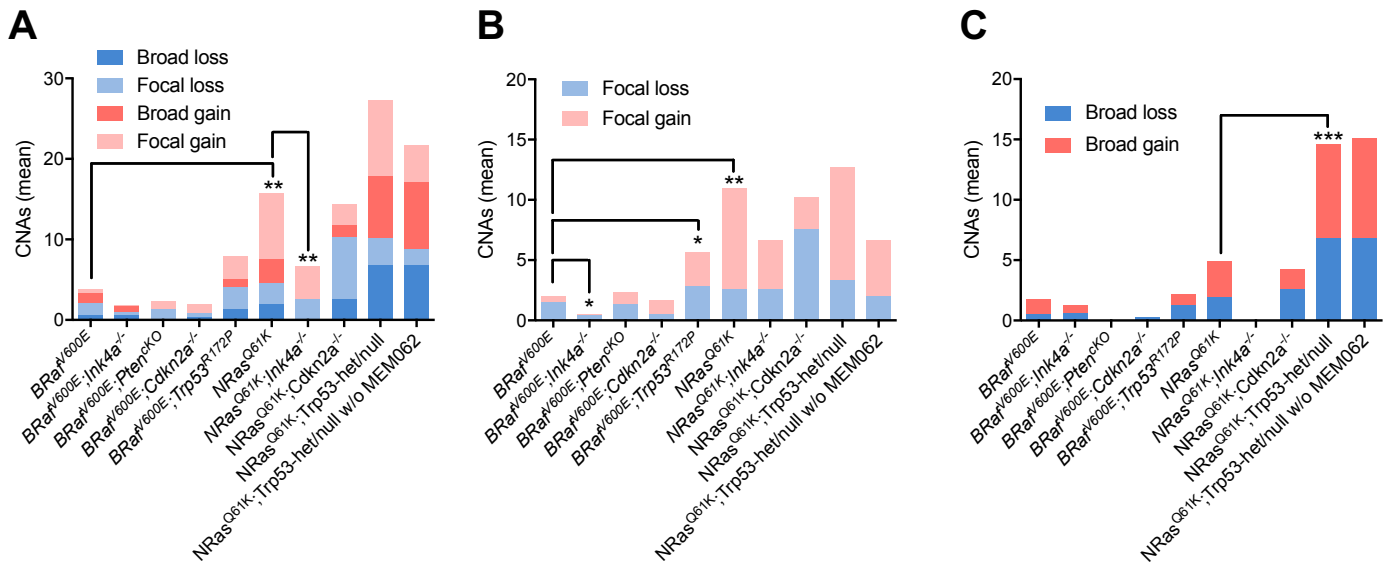

**Supplementary Figure 2:** Graphs showing the average number of both focal and broad CNAs (**A**) and separate comparisons for only focal (**B**) and broad (**C**) CNAs per experimental group. The *NRas*<sup>Q61K</sup>; *Trp53*-het/null group is shown with and without MEM062 sample to clarify that the increase of CNAs in this sample is purely because of focal CNAs. Significance determined by unpaired two-sided *t*-test (\*  $P \leq 0.05$ ; \*\*  $P \leq 0.01$ ; \*\*\*  $P \leq 0.001$ ).

**A**

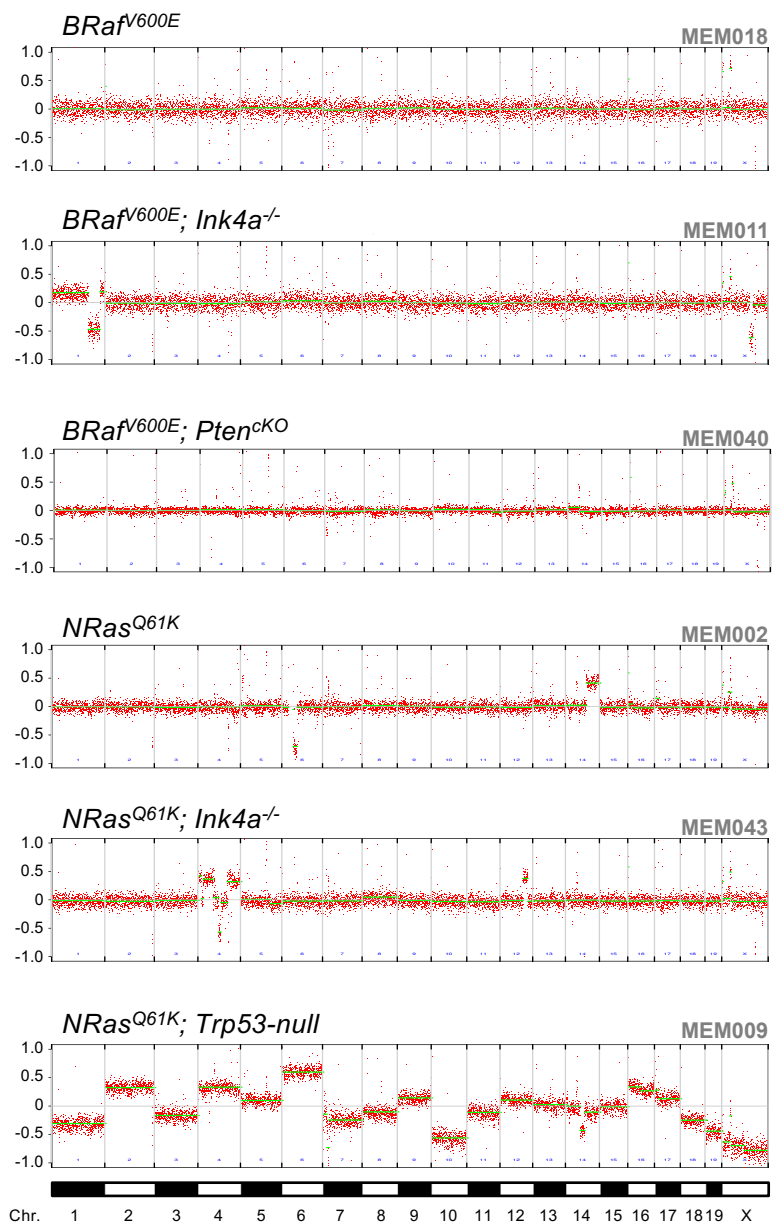

**B**

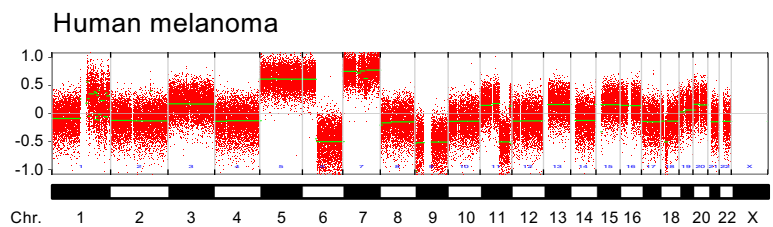

**Supplementary Figure 3:** Representative plots of shallow WGS from murine genetically-induced melanomas with the indicated genotypes (**A**) and from a human melanoma (**B**).

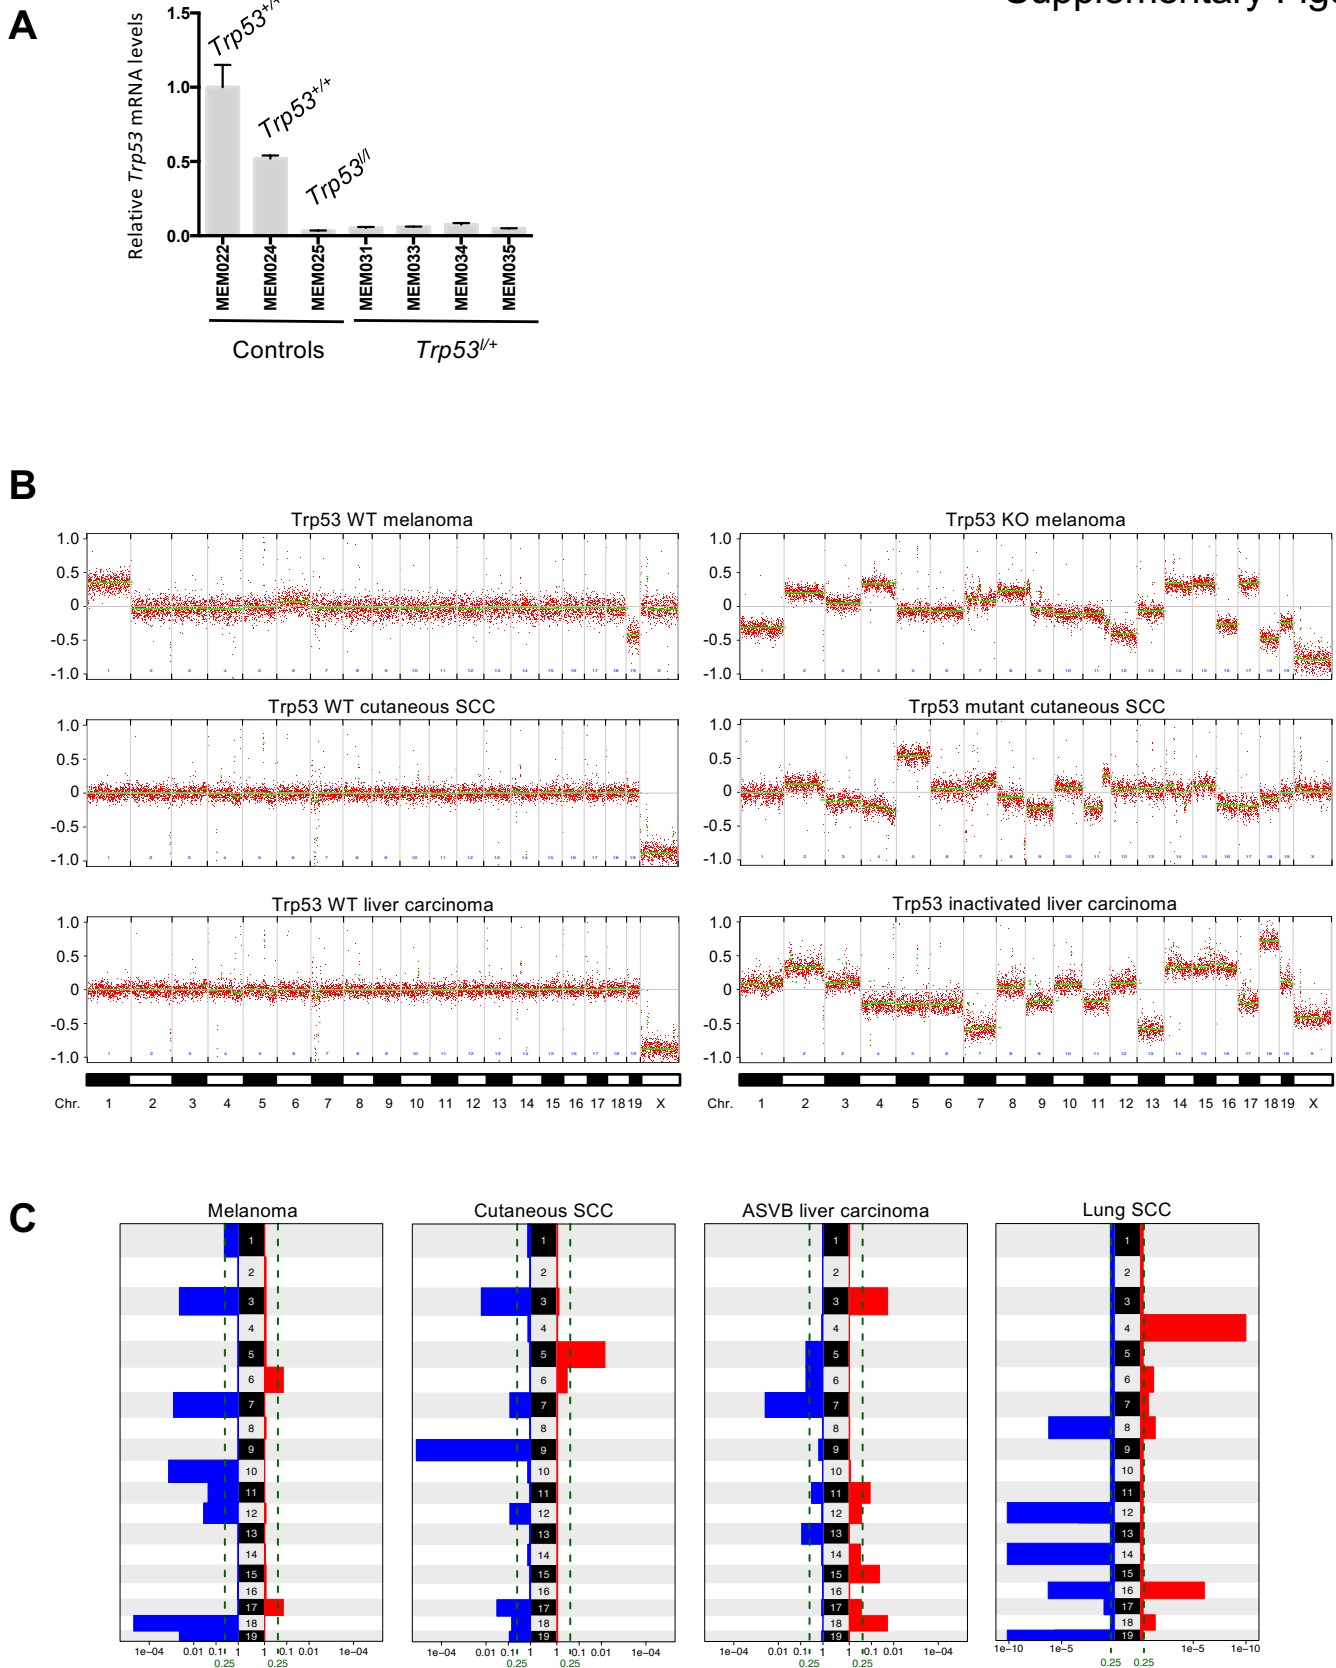

**Supplementary Figure 4: p53 loss leads to aneuploidy.** (A) *Trp53* mRNA levels assessed by RT-qPCR in melanoma samples with the indicated genotypes. (B) Shallow WGS plots of representative *Trp53* wild-type (left panels) or inactivated *Trp53* (right panels) murine melanoma, cutaneous squamous cell carcinoma (SCC) and liver carcinoma. (C) GISTIC analysis of recurrent whole-chromosome amplification (red) or deletion (blue) in *Trp53* inactivated tumors of various origins, including melanoma, cutaneous SCC, liver carcinoma and lung carcinoma. The lung SCC plot was adapted from McFadden *et al.* (27).



Supplementary Figure 5

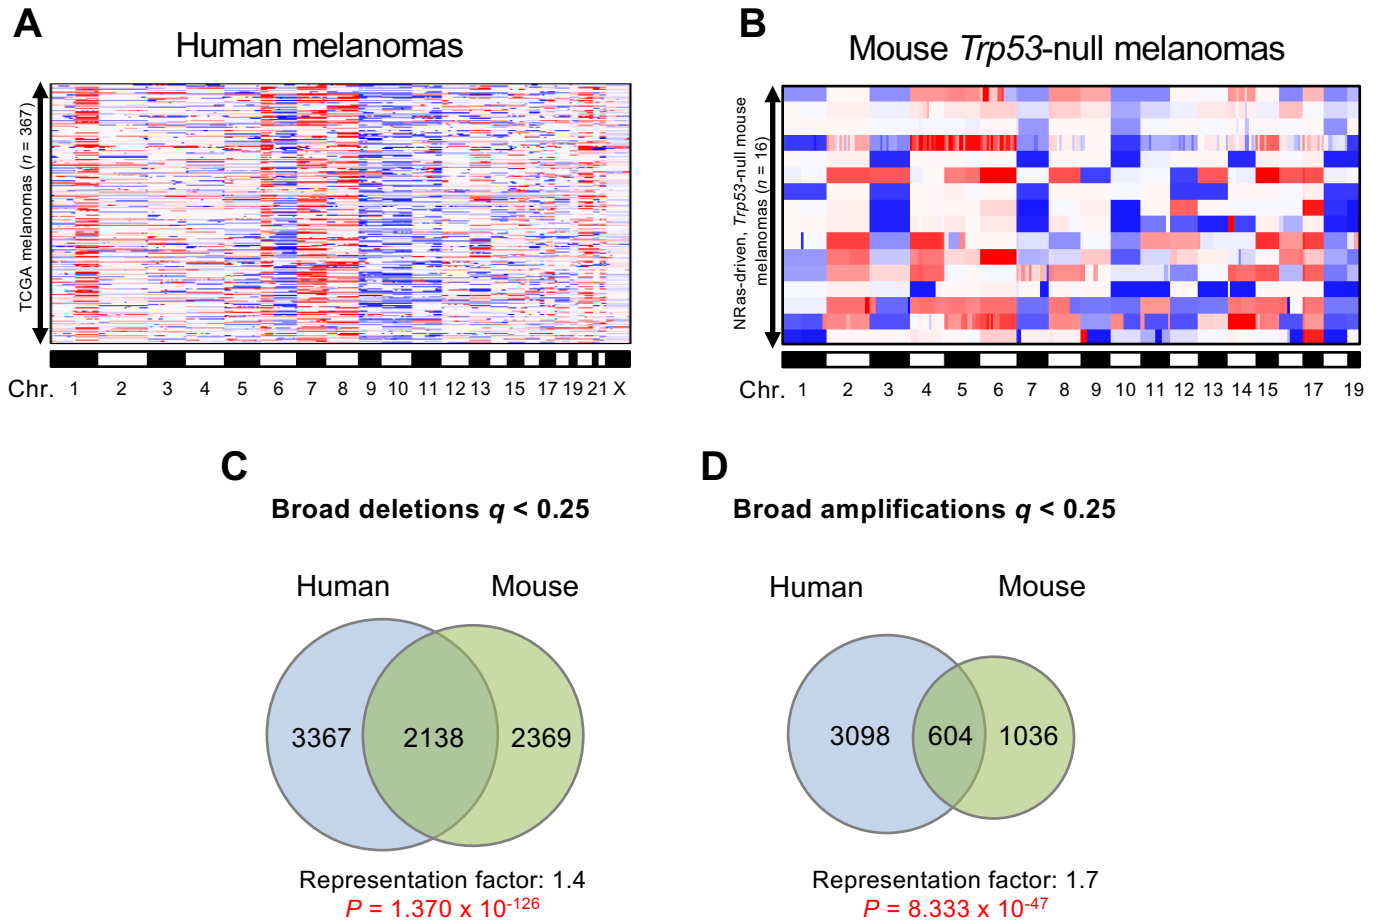

**Supplementary Figure 5: CNA Profiles of NRas-driven, *Trp53*-null melanomas recapitulate CNAs from human melanomas.** (A-B) Heat maps of CNAs in human melanomas from the TCGA cohort ( $n = 367$ ; A) and NRas-driven, *Trp53*-null murine melanomas ( $n = 16$ ; B). (C-D) Statistical significance of the overlap between gene orthologues targeted by broad CNAs in human vs. murine melanomas. Human and mouse orthologues ( $n = 16,728$  genes) targeted by recurrent broad deletions ( $q < 0.25$ ; C) or amplifications ( $q < 0.25$ ; D) were analyzed. Statistical significance of overlapping gene sets was determined by a hypergeometric distribution test.

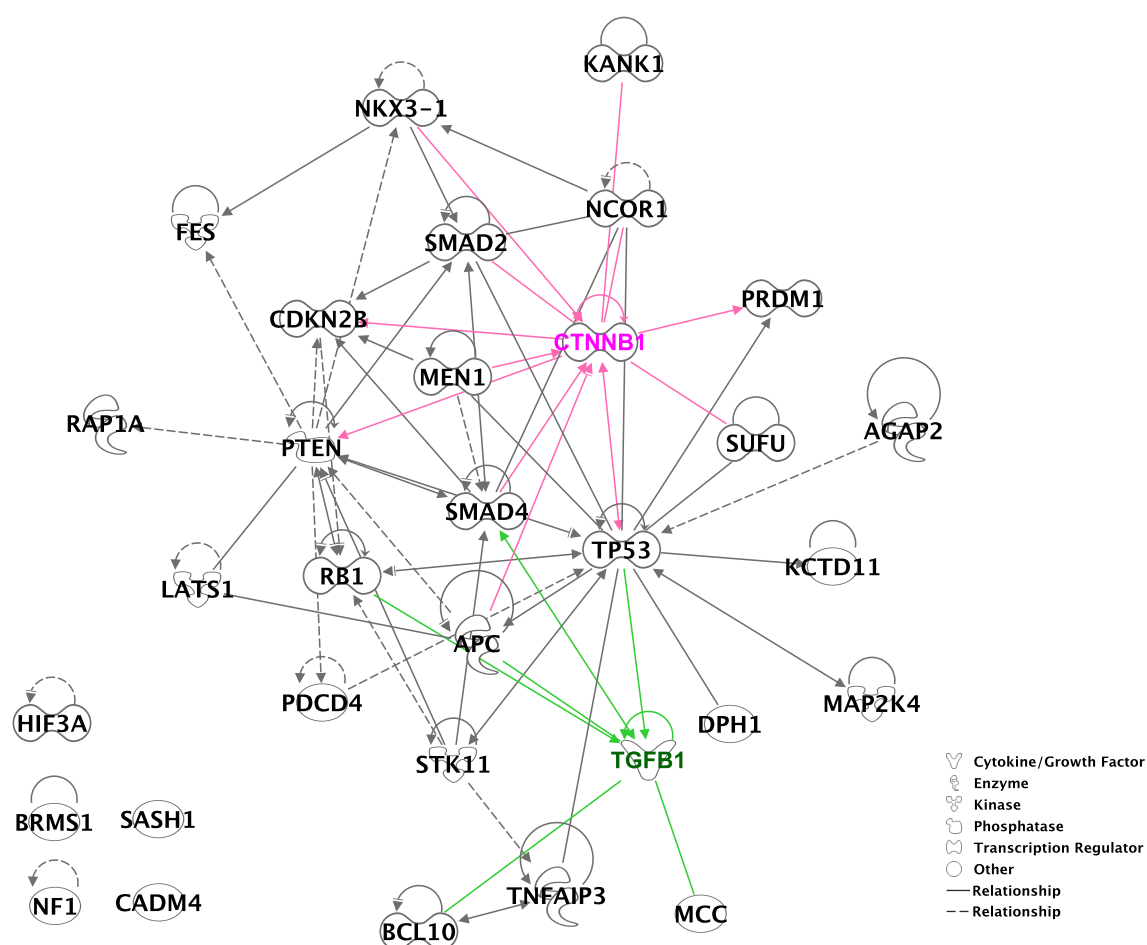

**Supplementary Figure 6: Pathway analysis of putative melanoma TSGs.** IPA analysis of 30 selected genes which are targeted by deletions in murine melanomas. 76% of these genes are functionally linked; many of these genes are connected to known melanoma driver and progression pathways such the WNT/ $\beta$ -catenin, p53 and TGF-beta signaling pathways.

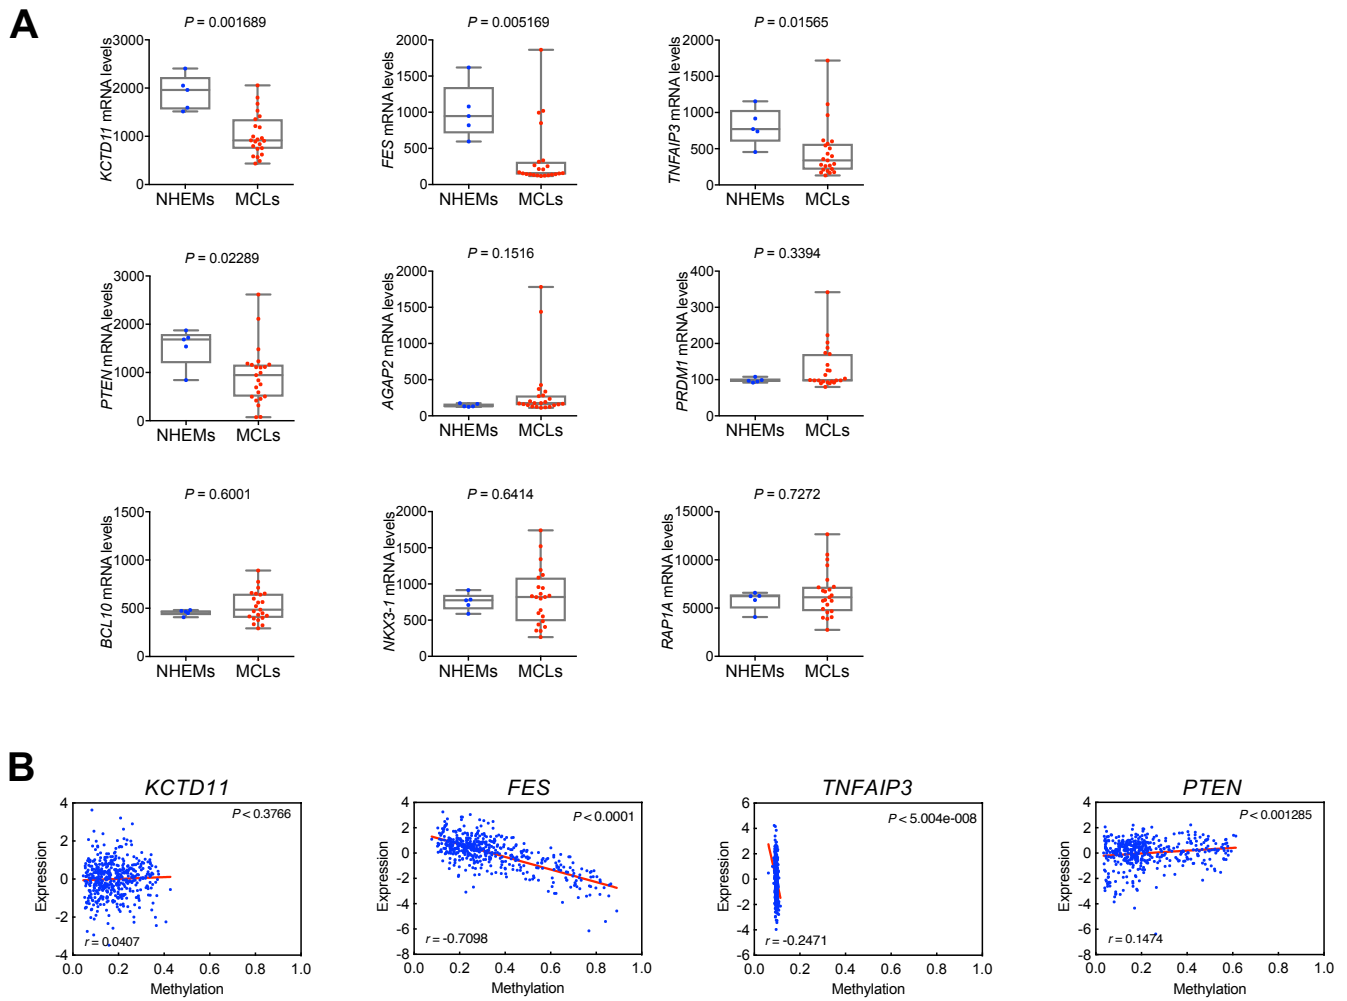

**Supplementary Figure 7: Expression of 9 putative TSGs in human melanomas.** (A) Expression profiles of putative TSGs in normal human melanocytes (NHEMs) and melanoma cell lines (MCLs) as assessed by the analysis of the microarray dataset described in Rambow *et al.* (ref. 38). (B) Correlation plots between mRNA levels and the average methylation of CpGs in the vicinity of the TSS of selected putative TSGs. Pearson  $r$  and significance is indicated. Statistical significance was determined by unpaired two-sided  $t$ -test (A) and Pearson correlation (B).

## Supplementary Figure 8

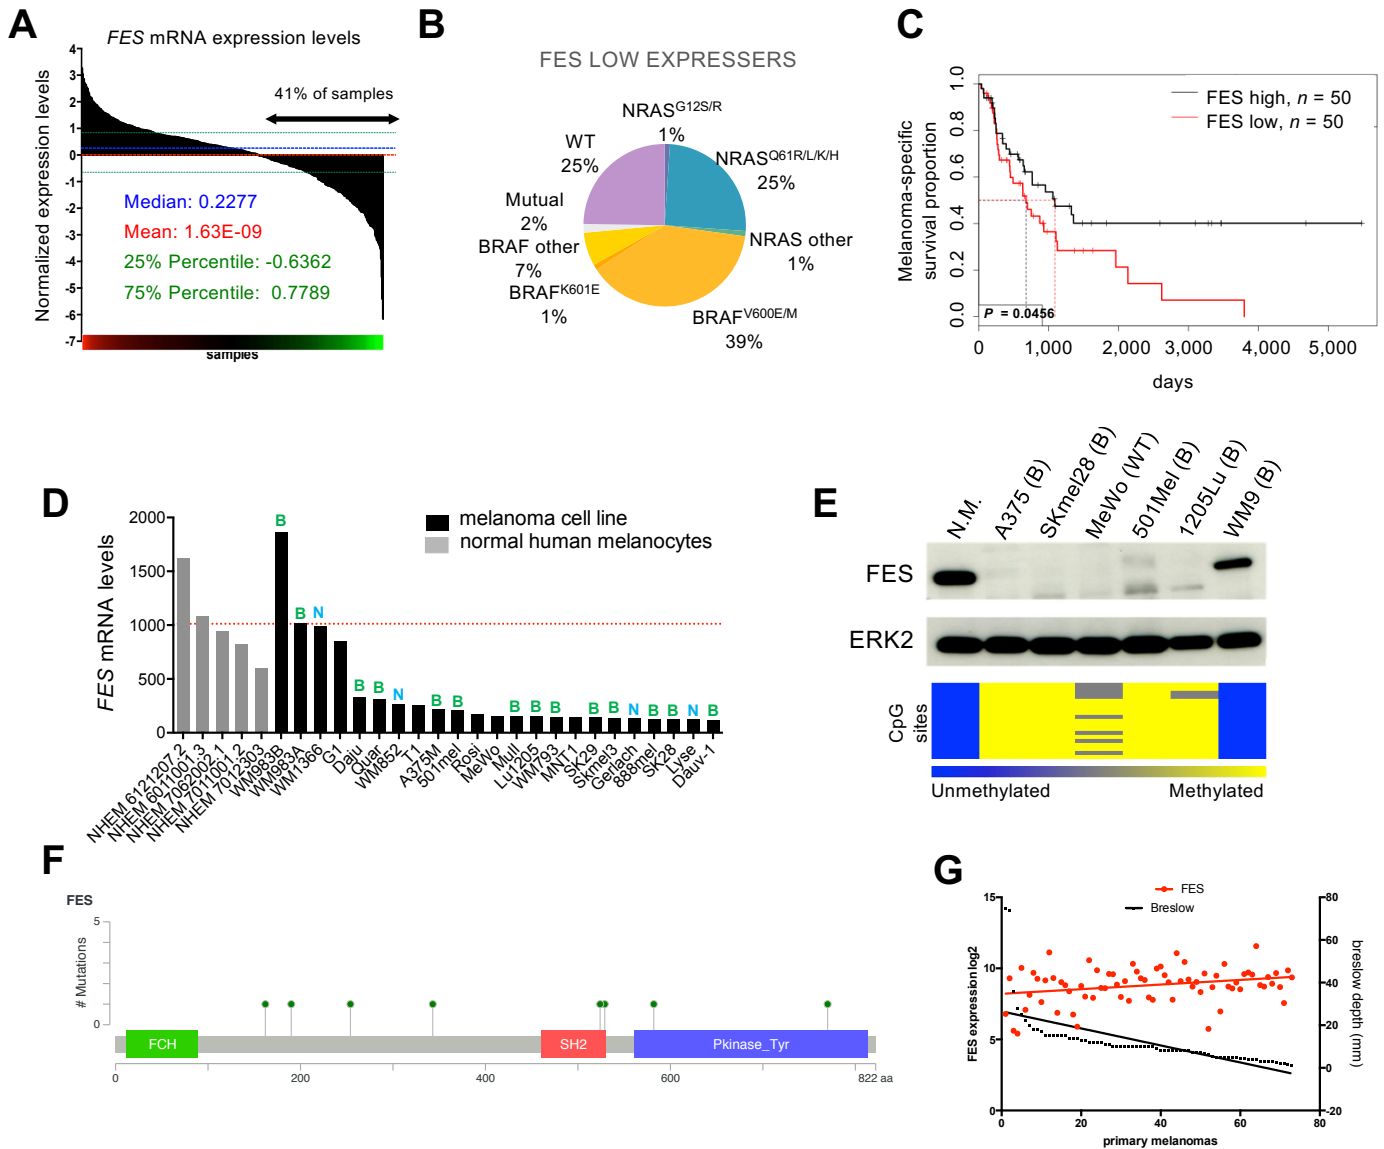

**Supplementary Figure 8: FES expression in human melanomas.** (A) Expression profile plot of *FES* mRNA in the TCGA cohort of human melanomas. (B) BRAF and NRAS mutational status of *FES* low expressing melanomas from TCGA-SKCM (samples from (A) with expression below the mean). (C) Survival curve of *FES*-high and *FES*-low ( $n = 50$  per group) expressing melanoma patients. (D) Expression of *FES* in normal human melanocytes (NHEM; shown as grey columns) and melanoma cell lines (shown as black columns) as assessed by analysis of the microarray dataset described by Rambow *et al.* (ref. 38). The BRAF<sup>V600E</sup> (B) and NRAS<sup>Q61K,L,R</sup> (N) mutational status of cell lines is indicated. The red dotted line indicates mean value of NHEM. (E) Western blotting analysis of *FES* in melanoma cell lines and normal human melanocyte culture (N.M.). The methylation profile of the CpG island located close to the TSS of *FES* is shown below. The BRAF<sup>V600E</sup> (B) and NRAS<sup>Q61K,L,R</sup> (N) mutational status of cell lines is indicated in brackets. (F) cBioPortal visualization of the mutations targeting the *FES* locus in TCGA-SKCM cohort. (G) Plot showing the log<sub>2</sub>-transformed expression values of *FES* in relation with the Breslow depth of human melanomas from TCGA cohort. Statistical significance was determined using Mantel-Cox test (B).

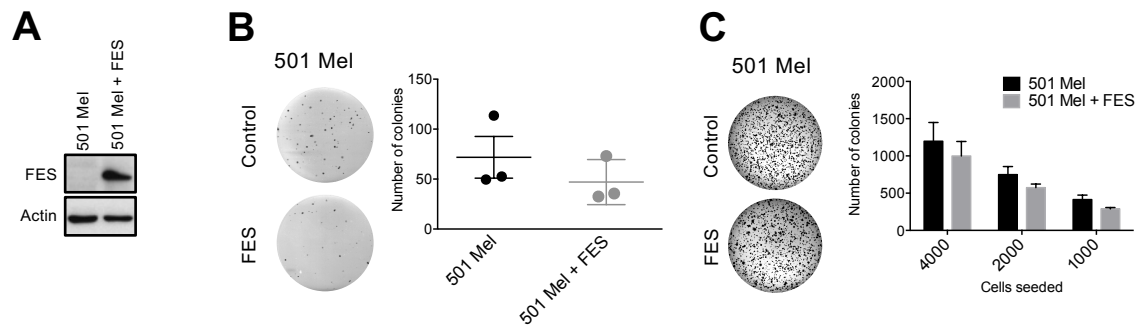

**Supplementary Figure 9: Restoration of FES expression in the 501 Mel human melanoma cell line.** (A) Western blot analysis of FES in 501 Mel cell line with overexpression of FES. Actin served as a loading control. (B) Clonogenic assay of 501 Mel cells with and without expression of exogenous FES. Error bars, mean  $\pm$  s.e.m. ( $n = 3$  biological replicates per group). (C) Soft agar assay of 501 Mel cells with and without expression of exogenous FES. Error bars, mean  $\pm$  s.e.m. ( $n = 3$  biological replicates per group).

Supplementary Figure 10

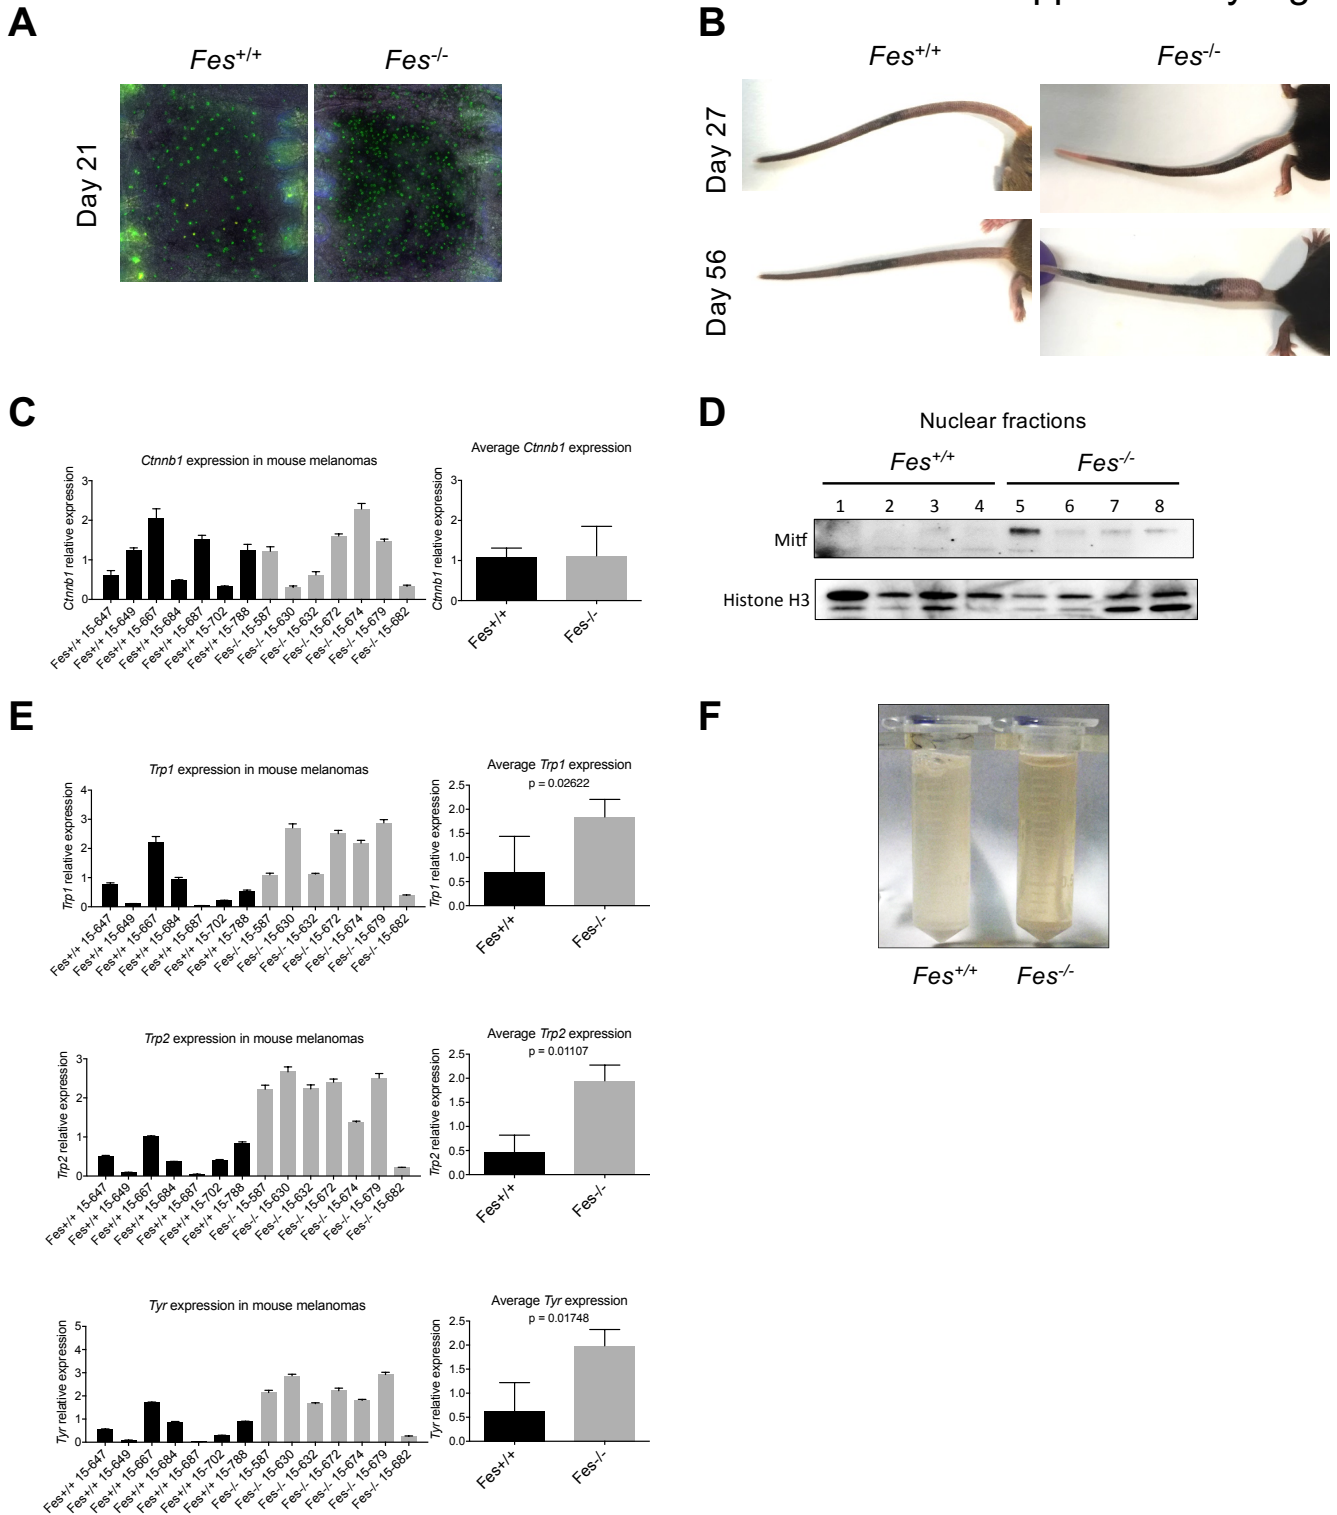

**Supplementary Figure 10: Increased pigmentation in *FES* KO melanomas.** (A) Representative pictures of epidermal whole mount displaying the area of individual tail scales at day 21 after 4-HT treatment. Melanoma cells are stained using gp100 antibody (green). (B) Representative pictures of tails of *Tyr::Cre*<sup>ERT2/+</sup>; *Braf*<sup>CA/+</sup>; *Pten*<sup>fl/fl</sup> mice either *Fes*<sup>+/+</sup> or *Fes*<sup>-/-</sup> at day 27 and 56 post-topical treatment of the tail with 5 mM of 4-HT. (C) RT-qPCR analysis showing expression of *Ctnnb1* in *Fes*<sup>+/+</sup> or *Fes*<sup>-/-</sup> melanomas. Error bars, mean  $\pm$  s.d. (*n* = 3). The graph on the right shows average value per group. Error bars, mean  $\pm$  s.e.m. (*n* = 7 per group). (D) Western blotting of MITF and Histone H3 (as loading control) in nuclear extracts from *Fes*<sup>+/+</sup> or *Fes*<sup>-/-</sup> melanomas. (E) Expression of key pigmentation genes *Trp1*, *Trp2* and *Tyr* in *Fes*<sup>+/+</sup> or *Fes*<sup>-/-</sup> melanomas. Error bars, mean  $\pm$  s.d. (*n* = 3). The graph on the right shows average value per group. Error bars, mean  $\pm$  s.e.m. (*n* = 7 per group). (F) Representative images highlighting the difference in pigmentation intensity in *Fes*<sup>+/+</sup> and *Fes*<sup>-/-</sup> total protein extracts. The statistical significance was determined using Mann-Whitney *U*-test (C, E).
